# Supplementary material for: Optimization of Emission Reduction Target in the Beijing–Tianjin–Hebei Region: An Atmospheric Transfer Coefficient Matrix Perspective
Source: MDPI journal article supplement (doi:10.3390/ijerph192013512), 2022-10-19
Supplement: s1 [file s1]

# International Journal of Environmental Research and Public Health

## Supplementary Information for “*Optimization of Emission Reduction Target in Beijing–Tianjin–Hebei Region: An Atmospheric transfer coefficient matrix perspective*”

Yuan Wang<sup>1</sup>, Zhou Pan<sup>1</sup>, Yue Li<sup>1</sup>, Yaling Lu<sup>1,2,\*</sup>, Yiming Dong<sup>3</sup>, and Liying Ping<sup>1\*</sup>

<sup>1</sup> School of Environmental Science and Engineering, Tianjin University, Tianjin 300072, China

<sup>2</sup> Environmental Research Centre of Beijing-Tianjin-Hebei Region, Chinese Academy of Environmental Planning, Beijing 100012, China

<sup>3</sup> School of Environment, Beijing Normal University, Beijing 100091, China

\* Correspondence: luy1@caep.org.cn (Y.L.); pingly45\_@tju.edu.cn (L.P.)

**There are 21 Tables and 1 Figure.**

Table S1. Concentrations monitored by air quality monitoring stations in Beijing.

| City                   | Air Quality Monitoring Station           | Date      | Monitored Concentrations (Unit: $\mu\text{g}/\text{m}^3$ ) |                   |
|------------------------|------------------------------------------|-----------|------------------------------------------------------------|-------------------|
|                        |                                          |           | NO <sub>2</sub>                                            | PM <sub>2.5</sub> |
| Beijing                |                                          | 2016/1/1  | 106                                                        | 176               |
|                        |                                          | 2016/1/2  | 124                                                        | 266               |
|                        |                                          | 2016/1/3  | 83                                                         | 247               |
|                        |                                          | 2016/1/4  | 33                                                         | 37                |
|                        |                                          | 2016/1/5  | 38                                                         | 34                |
|                        |                                          | 2016/1/6  | 35                                                         | 25                |
|                        |                                          | 2016/1/7  | 28                                                         | 13                |
|                        |                                          | 2016/1/8  | 43                                                         | 35                |
|                        |                                          | 2016/1/9  | 74                                                         | 76                |
|                        | 1. Wanshou Temple                        | 2016/1/10 | 55                                                         | 46                |
|                        | 2. West Park officials                   | 2016/1/11 | 25                                                         | 11                |
|                        | 3. Changping Dingling                    | 2016/1/12 | 30                                                         | 14                |
|                        | 4. Dongsì                                | 2016/1/13 | 49                                                         | 26                |
|                        | 5. Temple of Heaven                      | 2016/1/14 | 73                                                         | 73                |
|                        | 6. Shunyi New Town                       | 2016/1/15 | 84                                                         | 100               |
|                        | 7. Changping Town                        | 2016/1/16 | 71                                                         | 123               |
|                        | 8. Chaoyang Agricultural Exhibition Hall | 2016/1/17 | 29                                                         | 37                |
|                        | 9. Huairou town                          | 2016/1/18 | 18                                                         | 10                |
|                        | 10. Haidian Wanliu                       | 2016/1/19 | 62                                                         | 62                |
|                        | 11. Shijingshan city                     | 2016/1/20 | 78                                                         | 117               |
|                        | 12. Chaoyang Olympic Sports Center       | 2016/1/21 | 68                                                         | 131               |
|                        |                                          | 2016/1/22 | 16                                                         | 13                |
|                        |                                          | 2016/1/23 | 12                                                         | 9                 |
|                        |                                          | 2016/1/24 | 24                                                         | 13                |
|                        |                                          | 2016/1/25 | 43                                                         | 28                |
|                        |                                          | 2016/1/26 | 37                                                         | 35                |
|                        |                                          | 2016/1/27 | 79                                                         | 98                |
|                        |                                          | 2016/1/28 | 80                                                         | 121               |
|                        |                                          | 2016/1/29 | 55                                                         | 62                |
|                        |                                          | 2016/1/30 | 48                                                         | 50                |
|                        |                                          | 2016/1/31 | 30                                                         | 18                |
| Average concentrations |                                          |           | 52.6                                                       | 67.94             |

Table S2. Concentrations monitored by air quality monitoring stations in Tianjin.

| City                   | Air Quality Monitoring Station | Date      | Monitored Concentrations (Unit: $\mu\text{g}/\text{m}^3$ ) |                   |
|------------------------|--------------------------------|-----------|------------------------------------------------------------|-------------------|
|                        |                                |           | NO <sub>2</sub>                                            | PM <sub>2.5</sub> |
| Tianjin                |                                | 2016/1/1  | 79                                                         | 176               |
|                        |                                | 2016/1/2  | 137                                                        | 334               |
|                        |                                | 2016/1/3  | 53                                                         | 94                |
|                        |                                | 2016/1/4  | 63                                                         | 104               |
|                        |                                | 2016/1/5  | 45                                                         | 37                |
|                        |                                | 2016/1/6  | 51                                                         | 45                |
|                        |                                | 2016/1/7  | 36                                                         | 26                |
|                        |                                | 2016/1/8  | 45                                                         | 30                |
|                        | 1. Qinjian street              | 2016/1/9  | 98                                                         | 188               |
|                        | 2. Dazhigu No.8 road           | 2016/1/10 | 70                                                         | 117               |
|                        | 3. Qianjin street              | 2016/1/11 | 44                                                         | 27                |
|                        | 4. Huaihe street               | 2016/1/12 | 41                                                         | 28                |
|                        | 5. Yuejin Road                 | 2016/1/13 | 73                                                         | 72                |
|                        | 6. No.4 street                 | 2016/1/14 | 101                                                        | 104               |
|                        | 7. Yongming road               | 2016/1/15 | 107                                                        | 175               |
|                        | 8. Hanbei road                 | 2016/1/16 | 46                                                         | 82                |
|                        | 9. Tuanpowa                    | 2016/1/17 | 46                                                         | 60                |
|                        | 10. Hexi Yijing road           | 2016/1/18 | 29                                                         | 23                |
|                        | 11. Jingu Road                 | 2016/1/19 | 58                                                         | 39                |
|                        | 12. Binshui Xidao              | 2016/1/20 | 70                                                         | 61                |
|                        | 13. Dali Road                  | 2016/1/21 | 50                                                         | 54                |
|                        | 14. Zhongshan North Road       | 2016/1/22 | 24                                                         | 25                |
|                        | 15. Xisi Road                  | 2016/1/23 | 14                                                         | 11                |
|                        |                                | 2016/1/24 | 28                                                         | 21                |
|                        |                                | 2016/1/25 | 56                                                         | 47                |
|                        |                                | 2016/1/26 | 52                                                         | 39                |
|                        |                                | 2016/1/27 | 82                                                         | 80                |
|                        |                                | 2016/1/28 | 77                                                         | 88                |
|                        |                                | 2016/1/29 | 36                                                         | 22                |
|                        |                                | 2016/1/30 | 55                                                         | 40                |
|                        |                                | 2016/1/31 | 39                                                         | 39                |
| Average concentrations |                                |           | 58.2                                                       | 73.81             |

Table S3. Concentrations monitored by air quality monitoring stations in Hengshui.

| City                   | Air Quality Monitoring Station                                                                                                    | Date      | Monitored Concentrations (Unit: $\mu\text{g}/\text{m}^3$ ) |                   |
|------------------------|-----------------------------------------------------------------------------------------------------------------------------------|-----------|------------------------------------------------------------|-------------------|
|                        |                                                                                                                                   |           | NO <sub>2</sub>                                            | PM <sub>2.5</sub> |
| Hengshui               | 1. Hengshui City Environmental<br>Protection Bureau<br>2. Electrical Machine North Factory<br>3. Environmental Monitoring Station | 2016/1/1  | 61                                                         | 171               |
|                        |                                                                                                                                   | 2016/1/2  | 105                                                        | 375               |
|                        |                                                                                                                                   | 2016/1/3  | 83                                                         | 380               |
|                        |                                                                                                                                   | 2016/1/4  | 57                                                         | 135               |
|                        |                                                                                                                                   | 2016/1/5  | 45                                                         | 58                |
|                        |                                                                                                                                   | 2016/1/6  | 64                                                         | 121               |
|                        |                                                                                                                                   | 2016/1/7  | 48                                                         | 69                |
|                        |                                                                                                                                   | 2016/1/8  | 80                                                         | 179               |
|                        |                                                                                                                                   | 2016/1/9  | 82                                                         | 248               |
|                        |                                                                                                                                   | 2016/1/10 | 76                                                         | 276               |
|                        |                                                                                                                                   | 2016/1/11 | 48                                                         | 53                |
|                        |                                                                                                                                   | 2016/1/12 | 60                                                         | 98                |
|                        |                                                                                                                                   | 2016/1/13 | 76                                                         | 129               |
|                        |                                                                                                                                   | 2016/1/14 | 73                                                         | 123               |
|                        |                                                                                                                                   | 2016/1/15 | 90                                                         | 168               |
|                        |                                                                                                                                   | 2016/1/16 | 77                                                         | 204               |
|                        |                                                                                                                                   | 2016/1/17 | 45                                                         | 95                |
|                        |                                                                                                                                   | 2016/1/18 | 57                                                         | 122               |
|                        |                                                                                                                                   | 2016/1/19 | 58                                                         | 81                |
|                        |                                                                                                                                   | 2016/1/20 | 70                                                         | 91                |
|                        |                                                                                                                                   | 2016/1/21 | 73                                                         | 132               |
|                        |                                                                                                                                   | 2016/1/22 | 39                                                         | 56                |
|                        |                                                                                                                                   | 2016/1/23 | 26                                                         | 37                |
|                        |                                                                                                                                   | 2016/1/24 | 26                                                         | 39                |
|                        |                                                                                                                                   | 2016/1/25 | 55                                                         | 89                |
|                        |                                                                                                                                   | 2016/1/26 | 61                                                         | 83                |
|                        |                                                                                                                                   | 2016/1/27 | 73                                                         | 106               |
|                        |                                                                                                                                   | 2016/1/28 | 98                                                         | 170               |
|                        |                                                                                                                                   | 2016/1/29 | 37                                                         | 60                |
|                        |                                                                                                                                   | 2016/1/30 | 38                                                         | 53                |
|                        |                                                                                                                                   | 2016/1/31 | 66                                                         | 143               |
| Average concentrations |                                                                                                                                   |           | 62.8                                                       | 133.68            |

Table S4. Concentrations monitored by air quality monitoring stations in Baoding.

| City                   | Air Quality Monitoring Station                                                                                                     | Date      | Monitored Concentrations (Unit: $\mu\text{g}/\text{m}^3$ ) |                   |
|------------------------|------------------------------------------------------------------------------------------------------------------------------------|-----------|------------------------------------------------------------|-------------------|
|                        |                                                                                                                                    |           | NO <sub>2</sub>                                            | PM <sub>2.5</sub> |
| Baoding                | 1. Huadian II<br>2. Reception Center<br>3. City Monitoring Station<br>4. Natatorium<br>5. Film Factory<br>6. Surface water Company | 2016/1/1  | 149                                                        | 243               |
|                        |                                                                                                                                    | 2016/1/2  | 180                                                        | 395               |
|                        |                                                                                                                                    | 2016/1/3  | 130                                                        | 282               |
|                        |                                                                                                                                    | 2016/1/4  | 72                                                         | 154               |
|                        |                                                                                                                                    | 2016/1/5  | 66                                                         | 128               |
|                        |                                                                                                                                    | 2016/1/6  | 90                                                         | 186               |
|                        |                                                                                                                                    | 2016/1/7  | 68                                                         | 114               |
|                        |                                                                                                                                    | 2016/1/8  | 87                                                         | 182               |
|                        |                                                                                                                                    | 2016/1/9  | 116                                                        | 244               |
|                        |                                                                                                                                    | 2016/1/10 | 88                                                         | 145               |
|                        |                                                                                                                                    | 2016/1/11 | 56                                                         | 78                |
|                        |                                                                                                                                    | 2016/1/12 | 78                                                         | 160               |
|                        |                                                                                                                                    | 2016/1/13 | 101                                                        | 209               |
|                        |                                                                                                                                    | 2016/1/14 | 102                                                        | 178               |
|                        |                                                                                                                                    | 2016/1/15 | 117                                                        | 210               |
|                        |                                                                                                                                    | 2016/1/16 | 86                                                         | 153               |
|                        |                                                                                                                                    | 2016/1/17 | 62                                                         | 87                |
|                        |                                                                                                                                    | 2016/1/18 | 62                                                         | 85                |
|                        |                                                                                                                                    | 2016/1/19 | 84                                                         | 123               |
|                        |                                                                                                                                    | 2016/1/20 | 112                                                        | 230               |
|                        |                                                                                                                                    | 2016/1/21 | 82                                                         | 124               |
|                        |                                                                                                                                    | 2016/1/22 | 35                                                         | 41                |
|                        |                                                                                                                                    | 2016/1/23 | 25                                                         | 34                |
|                        |                                                                                                                                    | 2016/1/24 | 38                                                         | 31                |
|                        |                                                                                                                                    | 2016/1/25 | 91                                                         | 143               |
|                        |                                                                                                                                    | 2016/1/26 | 86                                                         | 104               |
|                        |                                                                                                                                    | 2016/1/27 | 118                                                        | 204               |
|                        |                                                                                                                                    | 2016/1/28 | 112                                                        | 126               |
|                        |                                                                                                                                    | 2016/1/29 | 64                                                         | 60                |
|                        |                                                                                                                                    | 2016/1/30 | 53                                                         | 58                |
|                        |                                                                                                                                    | 2016/1/31 | 67                                                         | 116               |
| Average concentrations |                                                                                                                                    |           | 86.4                                                       | 149.26            |

Table S5. Concentrations monitored by air quality monitoring stations in Cangzhou.

| City                   | Air Quality Monitoring Station                                                                                   | Date      | Monitored Concentrations (Unit: $\mu\text{g}/\text{m}^3$ ) |                   |
|------------------------|------------------------------------------------------------------------------------------------------------------|-----------|------------------------------------------------------------|-------------------|
|                        |                                                                                                                  |           | NO <sub>2</sub>                                            | PM <sub>2.5</sub> |
| Cangzhou               | 1. Municipal Environmental Protection Agency<br>2. TV Broadcast Station<br>3. Cangxian Urban Construction Bureau | 2016/1/1  | 69                                                         | 167               |
|                        |                                                                                                                  | 2016/1/2  | 104                                                        | 296               |
|                        |                                                                                                                  | 2016/1/3  | 60                                                         | 135               |
|                        |                                                                                                                  | 2016/1/4  | 81                                                         | 90                |
|                        |                                                                                                                  | 2016/1/5  | 57                                                         | 50                |
|                        |                                                                                                                  | 2016/1/6  | 74                                                         | 79                |
|                        |                                                                                                                  | 2016/1/7  | 46                                                         | 32                |
|                        |                                                                                                                  | 2016/1/8  | 64                                                         | 73                |
|                        |                                                                                                                  | 2016/1/9  | 95                                                         | 186               |
|                        |                                                                                                                  | 2016/1/10 | 73                                                         | 161               |
|                        |                                                                                                                  | 2016/1/11 | 49                                                         | 34                |
|                        |                                                                                                                  | 2016/1/12 | 54                                                         | 58                |
|                        |                                                                                                                  | 2016/1/13 | 86                                                         | 127               |
|                        |                                                                                                                  | 2016/1/14 | 103                                                        | 179               |
|                        |                                                                                                                  | 2016/1/15 | 109                                                        | 177               |
|                        |                                                                                                                  | 2016/1/16 | 70                                                         | 99                |
|                        |                                                                                                                  | 2016/1/17 | 57                                                         | 76                |
|                        |                                                                                                                  | 2016/1/18 | 54                                                         | 57                |
|                        |                                                                                                                  | 2016/1/19 | 68                                                         | 51                |
|                        |                                                                                                                  | 2016/1/20 | 70                                                         | 61                |
|                        |                                                                                                                  | 2016/1/21 | 55                                                         | 64                |
|                        |                                                                                                                  | 2016/1/22 | 25                                                         | 31                |
|                        |                                                                                                                  | 2016/1/23 | 19                                                         | 23                |
|                        |                                                                                                                  | 2016/1/24 | 26                                                         | 24                |
|                        |                                                                                                                  | 2016/1/25 | 43                                                         | 49                |
|                        |                                                                                                                  | 2016/1/26 | 38                                                         | 39                |
|                        |                                                                                                                  | 2016/1/27 | 41                                                         | 33                |
|                        |                                                                                                                  | 2016/1/28 | 44                                                         | 67                |
|                        |                                                                                                                  | 2016/1/29 | 20                                                         | 29                |
|                        |                                                                                                                  | 2016/1/30 | 29                                                         | 40                |
|                        |                                                                                                                  | 2016/1/31 | 34                                                         | 43                |
| Average concentrations |                                                                                                                  |           | 58.6                                                       | 84.84             |

Table S6. Concentrations monitored by air quality monitoring stations in Chengde.

| City                   | Air Quality Monitoring Station                                                                           | Date      | Monitored Concentrations (Unit: $\mu\text{g}/\text{m}^3$ ) |                   |
|------------------------|----------------------------------------------------------------------------------------------------------|-----------|------------------------------------------------------------|-------------------|
|                        |                                                                                                          |           | NO <sub>2</sub>                                            | PM <sub>2.5</sub> |
| Chengde                | 1. Ligong<br>2. Bank of China<br>3. Economic and Technological<br>Development Zone<br>4. Cultural Center | 2016/1/1  | 69                                                         | 107               |
|                        |                                                                                                          | 2016/1/2  | 87                                                         | 149               |
|                        |                                                                                                          | 2016/1/3  | 81                                                         | 130               |
|                        |                                                                                                          | 2016/1/4  | 20                                                         | 19                |
|                        |                                                                                                          | 2016/1/5  | 36                                                         | 20                |
|                        |                                                                                                          | 2016/1/6  | 28                                                         | 26                |
|                        |                                                                                                          | 2016/1/7  | 18                                                         | 17                |
|                        |                                                                                                          | 2016/1/8  | 35                                                         | 29                |
|                        |                                                                                                          | 2016/1/9  | 54                                                         | 50                |
|                        |                                                                                                          | 2016/1/10 | 36                                                         | 41                |
|                        |                                                                                                          | 2016/1/11 | 22                                                         | 18                |
|                        |                                                                                                          | 2016/1/12 | 24                                                         | 19                |
|                        |                                                                                                          | 2016/1/13 | 35                                                         | 27                |
|                        |                                                                                                          | 2016/1/14 | 56                                                         | 48                |
|                        |                                                                                                          | 2016/1/15 | 58                                                         | 56                |
|                        |                                                                                                          | 2016/1/16 | 37                                                         | 65                |
|                        |                                                                                                          | 2016/1/17 | 30                                                         | 53                |
|                        |                                                                                                          | 2016/1/18 | 15                                                         | 19                |
|                        |                                                                                                          | 2016/1/19 | 44                                                         | 42                |
|                        |                                                                                                          | 2016/1/20 | 57                                                         | 44                |
|                        |                                                                                                          | 2016/1/21 | 50                                                         | 50                |
|                        |                                                                                                          | 2016/1/22 | 11                                                         | 18                |
|                        |                                                                                                          | 2016/1/23 | 6                                                          | 17                |
|                        |                                                                                                          | 2016/1/24 | 10                                                         | 16                |
|                        |                                                                                                          | 2016/1/25 | 36                                                         | 30                |
|                        |                                                                                                          | 2016/1/26 | 48                                                         | 41                |
|                        |                                                                                                          | 2016/1/27 | 60                                                         | 54                |
|                        |                                                                                                          | 2016/1/28 | 64                                                         | 70                |
|                        |                                                                                                          | 2016/1/29 | 51                                                         | 46                |
|                        |                                                                                                          | 2016/1/30 | 32                                                         | 36                |
|                        |                                                                                                          | 2016/1/31 | 28                                                         | 25                |
| Average concentrations |                                                                                                          |           | 39.9                                                       | 44.58             |

Table S7. Concentrations monitored by air quality monitoring stations in Handan.

| City                   | Air Quality Monitoring Station                                                                                | Date      | Monitored Concentrations (Unit: $\mu\text{g}/\text{m}^3$ ) |                   |
|------------------------|---------------------------------------------------------------------------------------------------------------|-----------|------------------------------------------------------------|-------------------|
|                        |                                                                                                               |           | NO <sub>2</sub>                                            | PM <sub>2.5</sub> |
| Handan                 | 1. East Sewage Factory<br>2. Municipal Environmental Protection Agency<br>3. CongTai Park<br>4. Mine Hospital | 2016/1/1  | 78                                                         | 122               |
|                        |                                                                                                               | 2016/1/2  | 153                                                        | 332               |
|                        |                                                                                                               | 2016/1/3  | 152                                                        | 268               |
|                        |                                                                                                               | 2016/1/4  | 74                                                         | 84                |
|                        |                                                                                                               | 2016/1/5  | 66                                                         | 74                |
|                        |                                                                                                               | 2016/1/6  | 65                                                         | 93                |
|                        |                                                                                                               | 2016/1/7  | 71                                                         | 140               |
|                        |                                                                                                               | 2016/1/8  | 80                                                         | 152               |
|                        |                                                                                                               | 2016/1/9  | 68                                                         | 158               |
|                        |                                                                                                               | 2016/1/10 | 93                                                         | 220               |
|                        |                                                                                                               | 2016/1/11 | 53                                                         | 45                |
|                        |                                                                                                               | 2016/1/12 | 56                                                         | 54                |
|                        |                                                                                                               | 2016/1/13 | 76                                                         | 114               |
|                        |                                                                                                               | 2016/1/14 | 68                                                         | 60                |
|                        |                                                                                                               | 2016/1/15 | 78                                                         | 100               |
|                        |                                                                                                               | 2016/1/16 | 94                                                         | 162               |
|                        |                                                                                                               | 2016/1/17 | 52                                                         | 91                |
|                        |                                                                                                               | 2016/1/18 | 51                                                         | 70                |
|                        |                                                                                                               | 2016/1/19 | 77                                                         | 112               |
|                        |                                                                                                               | 2016/1/20 | 76                                                         | 92                |
|                        |                                                                                                               | 2016/1/21 | 91                                                         | 153               |
|                        |                                                                                                               | 2016/1/22 | 49                                                         | 58                |
|                        |                                                                                                               | 2016/1/23 | 34                                                         | 34                |
|                        |                                                                                                               | 2016/1/24 | 46                                                         | 32                |
|                        |                                                                                                               | 2016/1/25 | 59                                                         | 46                |
|                        |                                                                                                               | 2016/1/26 | 58                                                         | 37                |
|                        |                                                                                                               | 2016/1/27 | 83                                                         | 125               |
|                        |                                                                                                               | 2016/1/28 | 96                                                         | 130               |
|                        |                                                                                                               | 2016/1/29 | 64                                                         | 90                |
|                        |                                                                                                               | 2016/1/30 | 41                                                         | 43                |
|                        |                                                                                                               | 2016/1/31 | 57                                                         | 74                |
| Average concentrations |                                                                                                               |           | 72.9                                                       | 108.55            |



Table S8. Concentrations monitored by air quality monitoring stations in Langfang.

| City                   | Air Quality Monitoring Station                                                                                                                                                                                    | Date      | Monitored Concentrations (Unit: $\mu\text{g}/\text{m}^3$ ) |                   |
|------------------------|-------------------------------------------------------------------------------------------------------------------------------------------------------------------------------------------------------------------|-----------|------------------------------------------------------------|-------------------|
|                        |                                                                                                                                                                                                                   |           | NO <sub>2</sub>                                            | PM <sub>2.5</sub> |
| Langfang               | 1. Environmental Monitoring Supervision Center<br>2. TCM Medical Material Company<br>3. Economic and Technological Development Zone<br>4. Hebei University of Technology<br>5. North China Institute of Aerospace | 2016/1/1  | 115                                                        | 287               |
|                        |                                                                                                                                                                                                                   | 2016/1/2  | 137                                                        | 350               |
|                        |                                                                                                                                                                                                                   | 2016/1/3  | 55                                                         | 160               |
|                        |                                                                                                                                                                                                                   | 2016/1/4  | 54                                                         | 79                |
|                        |                                                                                                                                                                                                                   | 2016/1/5  | 45                                                         | 41                |
|                        |                                                                                                                                                                                                                   | 2016/1/6  | 46                                                         | 43                |
|                        |                                                                                                                                                                                                                   | 2016/1/7  | 34                                                         | 21                |
|                        |                                                                                                                                                                                                                   | 2016/1/8  | 39                                                         | 23                |
|                        |                                                                                                                                                                                                                   | 2016/1/9  | 103                                                        | 186               |
|                        |                                                                                                                                                                                                                   | 2016/1/10 | 73                                                         | 136               |
|                        |                                                                                                                                                                                                                   | 2016/1/11 | 35                                                         | 21                |
|                        |                                                                                                                                                                                                                   | 2016/1/12 | 45                                                         | 35                |
|                        |                                                                                                                                                                                                                   | 2016/1/13 | 71                                                         | 76                |
|                        |                                                                                                                                                                                                                   | 2016/1/14 | 92                                                         | 153               |
|                        |                                                                                                                                                                                                                   | 2016/1/15 | 97                                                         | 169               |
|                        |                                                                                                                                                                                                                   | 2016/1/16 | 55                                                         | 89                |
|                        |                                                                                                                                                                                                                   | 2016/1/17 | 32                                                         | 30                |
|                        |                                                                                                                                                                                                                   | 2016/1/18 | 22                                                         | 16                |
|                        |                                                                                                                                                                                                                   | 2016/1/19 | 55                                                         | 54                |
|                        |                                                                                                                                                                                                                   | 2016/1/20 | 86                                                         | 127               |
|                        |                                                                                                                                                                                                                   | 2016/1/21 | 59                                                         | 78                |
|                        |                                                                                                                                                                                                                   | 2016/1/22 | 28                                                         | 23                |
|                        |                                                                                                                                                                                                                   | 2016/1/23 | 24                                                         | 13                |
|                        |                                                                                                                                                                                                                   | 2016/1/24 | 39                                                         | 20                |
|                        |                                                                                                                                                                                                                   | 2016/1/25 | 72                                                         | 64                |
|                        |                                                                                                                                                                                                                   | 2016/1/26 | 48                                                         | 39                |
|                        |                                                                                                                                                                                                                   | 2016/1/27 | 96                                                         | 160               |
|                        |                                                                                                                                                                                                                   | 2016/1/28 | 93                                                         | 112               |
|                        |                                                                                                                                                                                                                   | 2016/1/29 | 51                                                         | 42                |
|                        |                                                                                                                                                                                                                   | 2016/1/30 | 62                                                         | 66                |
|                        |                                                                                                                                                                                                                   | 2016/1/31 | 40                                                         | 42                |
| Average concentrations |                                                                                                                                                                                                                   |           | 61.4                                                       | 88.87             |

Table S9. Concentrations monitored by air quality monitoring stations in Qinhuangdao.

| City                   | Air Quality Monitoring Station                                                                                                                                    | Date      | Monitored Concentrations (Unit: $\mu\text{g}/\text{m}^3$ ) |                   |
|------------------------|-------------------------------------------------------------------------------------------------------------------------------------------------------------------|-----------|------------------------------------------------------------|-------------------|
|                        |                                                                                                                                                                   |           | NO <sub>2</sub>                                            | PM <sub>2.5</sub> |
| Qinhuangdao            | 1. City Monitoring Station<br>2. Shanhai Pass<br>3. City government<br>4. Beidaihe Environmental Protection Bureau<br>5. Contruction Plazz<br>6. Wenming District | 2016/1/1  | 98                                                         | 137               |
|                        |                                                                                                                                                                   | 2016/1/2  | 80                                                         | 134               |
|                        |                                                                                                                                                                   | 2016/1/3  | 44                                                         | 42                |
|                        |                                                                                                                                                                   | 2016/1/4  | 54                                                         | 56                |
|                        |                                                                                                                                                                   | 2016/1/5  | 43                                                         | 21                |
|                        |                                                                                                                                                                   | 2016/1/6  | 45                                                         | 34                |
|                        |                                                                                                                                                                   | 2016/1/7  | 47                                                         | 31                |
|                        |                                                                                                                                                                   | 2016/1/8  | 44                                                         | 22                |
|                        |                                                                                                                                                                   | 2016/1/9  | 57                                                         | 39                |
|                        |                                                                                                                                                                   | 2016/1/10 | 24                                                         | 18                |
|                        |                                                                                                                                                                   | 2016/1/11 | 36                                                         | 25                |
|                        |                                                                                                                                                                   | 2016/1/12 | 46                                                         | 35                |
|                        |                                                                                                                                                                   | 2016/1/13 | 40                                                         | 24                |
|                        |                                                                                                                                                                   | 2016/1/14 | 45                                                         | 28                |
|                        |                                                                                                                                                                   | 2016/1/15 | 45                                                         | 60                |
|                        |                                                                                                                                                                   | 2016/1/16 | 24                                                         | 41                |
|                        |                                                                                                                                                                   | 2016/1/17 | 28                                                         | 35                |
|                        |                                                                                                                                                                   | 2016/1/18 | 31                                                         | 22                |
|                        |                                                                                                                                                                   | 2016/1/19 | 36                                                         | 20                |
|                        |                                                                                                                                                                   | 2016/1/20 | 37                                                         | 29                |
|                        |                                                                                                                                                                   | 2016/1/21 | 41                                                         | 40                |
|                        |                                                                                                                                                                   | 2016/1/22 | 32                                                         | 33                |
|                        |                                                                                                                                                                   | 2016/1/23 | 18                                                         | 12                |
|                        |                                                                                                                                                                   | 2016/1/24 | 31                                                         | 14                |
|                        |                                                                                                                                                                   | 2016/1/25 | 62                                                         | 34                |
|                        |                                                                                                                                                                   | 2016/1/26 | 57                                                         | 38                |
|                        |                                                                                                                                                                   | 2016/1/27 | 87                                                         | 79                |
|                        |                                                                                                                                                                   | 2016/1/28 | 69                                                         | 73                |
|                        |                                                                                                                                                                   | 2016/1/29 | 22                                                         | 14                |
|                        |                                                                                                                                                                   | 2016/1/30 | 33                                                         | 21                |
|                        |                                                                                                                                                                   | 2016/1/31 | 52                                                         | 39                |
| Average concentrations |                                                                                                                                                                   |           | 45.4                                                       | 40.32             |

Table S10. Concentrations monitored by air quality monitoring stations in Shijiazhuang.

| City                   | Air Quality Monitoring Station | Date      | Monitored Concentrations (Unit: $\mu\text{g}/\text{m}^3$ ) |                   |
|------------------------|--------------------------------|-----------|------------------------------------------------------------|-------------------|
|                        |                                |           | NO <sub>2</sub>                                            | PM <sub>2.5</sub> |
| Shijiazhuang           |                                | 2016/1/1  | 122                                                        | 283               |
|                        |                                | 2016/1/2  | 169                                                        | 474               |
|                        |                                | 2016/1/3  | 139                                                        | 336               |
|                        |                                | 2016/1/4  | 88                                                         | 148               |
|                        |                                | 2016/1/5  | 67                                                         | 75                |
|                        |                                | 2016/1/6  | 85                                                         | 138               |
|                        |                                | 2016/1/7  | 69                                                         | 109               |
|                        |                                | 2016/1/8  | 66                                                         | 88                |
|                        |                                | 2016/1/9  | 94                                                         | 202               |
|                        |                                | 2016/1/10 | 95                                                         | 206               |
|                        |                                | 2016/1/11 | 46                                                         | 49                |
|                        | 1. Chemical College            | 2016/1/12 | 67                                                         | 105               |
|                        | 2. Worker hospital             | 2016/1/13 | 77                                                         | 88                |
|                        | 3. High-tech zone              | 2016/1/14 | 61                                                         | 43                |
|                        | 4. Northwest Water Company     | 2016/1/15 | 92                                                         | 120               |
|                        | 5. Fenglong Montain            | 2016/1/16 | 86                                                         | 181               |
|                        | 6. People's Hall               | 2016/1/17 | 58                                                         | 112               |
|                        | 7. 22 Central South Campus     | 2016/1/18 | 44                                                         | 53                |
|                        | 8. Shiji Park                  | 2016/1/19 | 81                                                         | 128               |
|                        | 9. Xi'nan College              | 2016/1/20 | 91                                                         | 181               |
|                        |                                | 2016/1/21 | 89                                                         | 164               |
|                        |                                | 2016/1/22 | 39                                                         | 58                |
|                        |                                | 2016/1/23 | 30                                                         | 39                |
|                        |                                | 2016/1/24 | 33                                                         | 17                |
|                        |                                | 2016/1/25 | 53                                                         | 33                |
|                        |                                | 2016/1/26 | 56                                                         | 40                |
|                        |                                | 2016/1/27 | 100                                                        | 154               |
|                        |                                | 2016/1/28 | 106                                                        | 169               |
|                        |                                | 2016/1/29 | 66                                                         | 108               |
|                        |                                | 2016/1/30 | 47                                                         | 68                |
|                        |                                | 2016/1/31 | 57                                                         | 85                |
| Average concentrations |                                |           | 76.5                                                       | 130.77            |

Table S11. Concentrations monitored by air quality monitoring stations in Tangshan.

| City     | Air Quality Monitoring Station                                                                                                                             | Date      | Monitored Concentrations (Unit: $\mu\text{g}/\text{m}^3$ ) |                   |
|----------|------------------------------------------------------------------------------------------------------------------------------------------------------------|-----------|------------------------------------------------------------|-------------------|
|          |                                                                                                                                                            |           | NO <sub>2</sub>                                            | PM <sub>2.5</sub> |
| Tangshan | 1. Supply and marketing cooperatives<br>2. Ceramics Company<br>3. No. 12 middle school<br>4. Xiaoshan Station<br>5. Commodities Bureau<br>6. Radar station | 2016/1/1  | 102                                                        | 206               |
|          |                                                                                                                                                            | 2016/1/2  | 133                                                        | 342               |
|          |                                                                                                                                                            | 2016/1/3  | 94                                                         | 183               |
|          |                                                                                                                                                            | 2016/1/4  | 66                                                         | 72                |
|          |                                                                                                                                                            | 2016/1/5  | 48                                                         | 46                |
|          |                                                                                                                                                            | 2016/1/6  | 59                                                         | 64                |
|          |                                                                                                                                                            | 2016/1/7  | 40                                                         | 33                |
|          |                                                                                                                                                            | 2016/1/8  | 54                                                         | 36                |
|          |                                                                                                                                                            | 2016/1/9  | 90                                                         | 134               |
|          |                                                                                                                                                            | 2016/1/10 | 60                                                         | 75                |
|          |                                                                                                                                                            | 2016/1/11 | 56                                                         | 48                |
|          |                                                                                                                                                            | 2016/1/12 | 45                                                         | 36                |
|          |                                                                                                                                                            | 2016/1/13 | 44                                                         | 29                |
|          |                                                                                                                                                            | 2016/1/14 | 80                                                         | 88                |
|          |                                                                                                                                                            | 2016/1/15 | 109                                                        | 159               |
|          |                                                                                                                                                            | 2016/1/16 | 67                                                         | 76                |
|          |                                                                                                                                                            | 2016/1/17 | 55                                                         | 66                |
|          |                                                                                                                                                            | 2016/1/18 | 59                                                         | 37                |

|                               |             |              |
|-------------------------------|-------------|--------------|
| 2016/1/19                     | 84          | 44           |
| 2016/1/20                     | 80          | 74           |
| 2016/1/21                     | 62          | 86           |
| 2016/1/22                     | 38          | 44           |
| 2016/1/23                     | 22          | 18           |
| 2016/1/24                     | 21          | 16           |
| 2016/1/25                     | 53          | 44           |
| 2016/1/26                     | 58          | 51           |
| 2016/1/27                     | 84          | 81           |
| 2016/1/28                     | 92          | 105          |
| 2016/1/29                     | 49          | 39           |
| 2016/1/30                     | 62          | 60           |
| 2016/1/31                     | 54          | 42           |
| <hr/>                         |             |              |
| <b>Average concentrations</b> | <b>65.2</b> | <b>78.52</b> |
| <hr/>                         |             |              |

Table S12. Concentrations monitored by air quality monitoring stations in Xingtai.

| City                   | Air Quality Monitoring Station                                                                                       | Date      | Monitored Concentrations (Unit: $\mu\text{g}/\text{m}^3$ ) |                   |
|------------------------|----------------------------------------------------------------------------------------------------------------------|-----------|------------------------------------------------------------|-------------------|
|                        |                                                                                                                      |           | NO <sub>2</sub>                                            | PM <sub>2.5</sub> |
| Xingtai                | 1. Dahuo fountain<br>2. Xingtai Normal College<br>3. Road and Bridge Corporation<br>4. Environment protection office | 2016/1/1  | 142                                                        | 239               |
|                        |                                                                                                                      | 2016/1/2  | 180                                                        | 405               |
|                        |                                                                                                                      | 2016/1/3  | 172                                                        | 362               |
|                        |                                                                                                                      | 2016/1/4  | 85                                                         | 140               |
|                        |                                                                                                                      | 2016/1/5  | 70                                                         | 74                |
|                        |                                                                                                                      | 2016/1/6  | 95                                                         | 128               |
|                        |                                                                                                                      | 2016/1/7  | 78                                                         | 120               |
|                        |                                                                                                                      | 2016/1/8  | 94                                                         | 142               |
|                        |                                                                                                                      | 2016/1/9  | 99                                                         | 217               |
|                        |                                                                                                                      | 2016/1/10 | 112                                                        | 275               |
|                        |                                                                                                                      | 2016/1/11 | 50                                                         | 50                |
|                        |                                                                                                                      | 2016/1/12 | 72                                                         | 76                |
|                        |                                                                                                                      | 2016/1/13 | 72                                                         | 78                |
|                        |                                                                                                                      | 2016/1/14 | 74                                                         | 76                |
|                        |                                                                                                                      | 2016/1/15 | 86                                                         | 102               |
|                        |                                                                                                                      | 2016/1/16 | 100                                                        | 166               |
|                        |                                                                                                                      | 2016/1/17 | 64                                                         | 108               |
|                        |                                                                                                                      | 2016/1/18 | 67                                                         | 102               |
|                        |                                                                                                                      | 2016/1/19 | 85                                                         | 114               |
|                        |                                                                                                                      | 2016/1/20 | 98                                                         | 150               |
|                        |                                                                                                                      | 2016/1/21 | 97                                                         | 142               |
|                        |                                                                                                                      | 2016/1/22 | 57                                                         | 70                |
|                        |                                                                                                                      | 2016/1/23 | 32                                                         | 42                |
|                        |                                                                                                                      | 2016/1/24 | 46                                                         | 42                |
|                        |                                                                                                                      | 2016/1/25 | 66                                                         | 56                |
|                        |                                                                                                                      | 2016/1/26 | 68                                                         | 56                |
|                        |                                                                                                                      | 2016/1/27 | 96                                                         | 113               |
|                        |                                                                                                                      | 2016/1/28 | 112                                                        | 130               |
|                        |                                                                                                                      | 2016/1/29 | 71                                                         | 100               |
|                        |                                                                                                                      | 2016/1/30 | 36                                                         | 44                |
|                        |                                                                                                                      | 2016/1/31 | 59                                                         | 77                |
| Average concentrations |                                                                                                                      |           | 85                                                         | 128.9             |

Table S13. Concentrations monitored by air quality monitoring stations in Zhangjiakou.

| City                   | Air Quality Monitoring Station                                                          | Date      | Monitored Concentrations (Unit: $\mu\text{g}/\text{m}^3$ ) |                   |
|------------------------|-----------------------------------------------------------------------------------------|-----------|------------------------------------------------------------|-------------------|
|                        |                                                                                         |           | NO <sub>2</sub>                                            | PM <sub>2.5</sub> |
| Zhangjiakou            | 1. People's Park<br>2. Probe factory<br>3. Century Compound<br>4. North Pumping Station | 2016/1/1  | 56                                                         | 70                |
|                        |                                                                                         | 2016/1/2  | 36                                                         | 44                |
|                        |                                                                                         | 2016/1/3  | 26                                                         | 29                |
|                        |                                                                                         | 2016/1/4  | 15                                                         | 16                |
|                        |                                                                                         | 2016/1/5  | 19                                                         | 18                |
|                        |                                                                                         | 2016/1/6  | 20                                                         | 22                |
|                        |                                                                                         | 2016/1/7  | 20                                                         | 19                |
|                        |                                                                                         | 2016/1/8  | 22                                                         | 20                |
|                        |                                                                                         | 2016/1/9  | 33                                                         | 27                |
|                        |                                                                                         | 2016/1/10 | 18                                                         | 22                |
|                        |                                                                                         | 2016/1/11 | 12                                                         | 15                |
|                        |                                                                                         | 2016/1/12 | 20                                                         | 20                |
|                        |                                                                                         | 2016/1/13 | 20                                                         | 17                |
|                        |                                                                                         | 2016/1/14 | 24                                                         | 21                |
|                        |                                                                                         | 2016/1/15 | 51                                                         | 45                |
|                        |                                                                                         | 2016/1/16 | 64                                                         | 95                |
|                        |                                                                                         | 2016/1/17 | 10                                                         | 19                |
|                        |                                                                                         | 2016/1/18 | 12                                                         | 17                |
|                        |                                                                                         | 2016/1/19 | 29                                                         | 24                |
|                        |                                                                                         | 2016/1/20 | 33                                                         | 29                |
|                        |                                                                                         | 2016/1/21 | 16                                                         | 23                |
|                        |                                                                                         | 2016/1/22 | 7                                                          | 14                |
|                        |                                                                                         | 2016/1/23 | 6                                                          | 16                |
|                        |                                                                                         | 2016/1/24 | 15                                                         | 16                |
|                        |                                                                                         | 2016/1/25 | 26                                                         | 23                |
|                        |                                                                                         | 2016/1/26 | 30                                                         | 26                |
|                        |                                                                                         | 2016/1/27 | 42                                                         | 40                |
|                        |                                                                                         | 2016/1/28 | 27                                                         | 28                |
|                        |                                                                                         | 2016/1/29 | 45                                                         | 48                |
|                        |                                                                                         | 2016/1/30 | 14                                                         | 16                |
|                        |                                                                                         | 2016/1/31 | 17                                                         | 17                |
| Average concentrations |                                                                                         |           | 25.3                                                       | 27.61             |

Table S14. Parameterization scheme for WRF.

| Model Parameterization       | WRF                                             |
|------------------------------|-------------------------------------------------|
| Domain setting               | D1: 1,320 km × 1,320 km;<br>D2: 864 km × 960 km |
| Microphysical process scheme | WSM6                                            |
| Longwave radiation scheme    | New Goddard                                     |
| Solar radiation scheme       | RRTM                                            |
| Surface layer scheme         | Pleim Xiu                                       |
| Boundary layer scheme        | ACM2                                            |
| Cumulus convection scheme    | Kain–Fritsch                                    |

Table S15. Parameterization used in CALPUFF.

| Model Parameterization       | CALPUFF           | Model Parameterization             | CALPUFF                                                        |
|------------------------------|-------------------|------------------------------------|----------------------------------------------------------------|
| Model version                | 6.42              | Vertical diffusion                 | Gaussian                                                       |
| Domain setting               | 576 km × 738 km   | Chemical mechanism flag<br>(MCHEM) | MESOPUFF II                                                    |
| Nested grids                 | Single layer grid | Plume rise                         | Briggs Plume Rise                                              |
| Horizontal resolution        | 6 km              | Terrain adjustment                 | Partial Plume Path Adjustment                                  |
| Number of vertical<br>layers | 11                | Building downwash                  | ISC method                                                     |
| Horizontal diffusion         | Gaussian          | Dry deposition                     | Vertical Structure and Mass<br>Depletion/Resistance Deposition |



Table S16. The transfer coefficient matrix of NO<sub>x</sub>.

| NO <sub>x</sub> (Unit: ×10 <sup>-3</sup> μg/m <sup>3</sup> •t) | Emission City |         |         |        |           |          |          |         |              |             |         |          |         |             |
|----------------------------------------------------------------|---------------|---------|---------|--------|-----------|----------|----------|---------|--------------|-------------|---------|----------|---------|-------------|
|                                                                | Receptor      | Beijing | Baoding | Handan | Liangfang | Cangzhou | Hengshui | Tianjin | Shijiazhuang | Qinhuangdao | Chengde | Tangshan | Xingtai | Zhangjiakou |
| Beijing                                                        | 3.31          | 0.35    | 0       | 0.24   | 0         | 0.52     | 0        | 0.35    | 0.09         | 0           | 0.25    | 0        | 0.3     |             |
| Baoding                                                        | 0.72          | 4.08    | 0.04    | 0.08   | 0.23      | 0.28     | 0        | 1.46    | 0.17         | 0           | 0.99    | 0        | 0.03    |             |
| Handan                                                         | 0.14          | 0.14    | 3.64    | 0.3    | 1.24      | 0.01     | 0.09     | 0.54    | 0.01         | 0.41        | 0.01    | 0.32     | 0.01    |             |
| Liangfang                                                      | 0.71          | 0.24    | 0.13    | 3.6    | 0.22      | 0.03     | 0.01     | 0.89    | 0.03         | 0.19        | 0.07    | 0.02     | 0.05    |             |
| Cangzhou                                                       | 0.39          | 1.11    | 1.01    | 0.21   | 3.51      | 0.06     | 0.02     | 2.01    | 0.06         | 0.1         | 0.13    | 0.09     | 0.02    |             |
| Hengshui                                                       | 0.23          | 0.02    | 0       | 0      | 0         | 3.04     | 0        | 0.01    | 0.07         | 0           | 0.1     | 0        | 0.04    |             |
| Tianjin                                                        | 0.03          | 0.03    | 1.19    | 0.06   | 0.27      | 0        | 5.17     | 0.11    | 0            | 0.41        | 0       | 3.29     | 0       |             |
| Shijiazhuang                                                   | 1.93          | 1.86    | 0.14    | 0.37   | 0.41      | 0.17     | 0        | 4.66    | 0.11         | 0.02        | 0.43    | 0.01     | 0.08    |             |
| Qinhuangdao                                                    | 0.05          | 0.16    | 0       | 0.01   | 0.02      | 1.75     | 0        | 0.05    | 1.73         | 0           | 1.81    | 0        | 0.01    |             |
| Chengde                                                        | 0.09          | 0.05    | 0.31    | 1.15   | 0.16      | 0        | 0.05     | 0.22    | 0.01         | 3.27        | 0.01    | 0.2      | 0       |             |
| Tangshan                                                       | 0.17          | 0.81    | 0       | 0.02   | 0.03      | 1        | 0        | 0.24    | 0.39         | 0           | 4.1     | 0        | 0.01    |             |
| Xingtai                                                        | 0.08          | 0.05    | 2.46    | 0.23   | 0.54      | 0        | 1.03     | 0.27    | 0            | 1.45        | 0       | 4.81     | 0       |             |
| Zhangjiakou                                                    | 0.05          | 0       | 0       | 0.03   | 0         | 0        | 0        | 0       | 0            | 0           | 0       | 0        | 0.84    |             |
| Sum                                                            | 7.9           | 8.9     | 8.92    | 6.3    | 6.63      | 6.86     | 6.37     | 10.81   | 2.67         | 5.85        | 7.9     | 8.74     | 1.39    |             |

Table S17. The transfer coefficient matrix of PM<sub>2.5</sub>.

| PM <sub>2.5</sub> (Unit: ×10 <sup>-3</sup><br>μg/m <sup>3</sup> •t) | Emission City |         |        |         |          |         |         |          |         |          |          |              |             |
|---------------------------------------------------------------------|---------------|---------|--------|---------|----------|---------|---------|----------|---------|----------|----------|--------------|-------------|
| Receptor                                                            | Qinhuangdao   | Tianjin | Handan | Xingtai | Cangzhou | Chengde | Baoding | Langfang | Beijing | Hengshui | Tangshan | Shijiazhuang | Zhangjiakou |
| Qinhuangdao                                                         | 24.67         | 14.62   | 8.94   | 18.41   | 9.28     | 8.53    | 4.35    | 23.08    | 5.22    | 8.56     | 9.38     | 5.95         | 4.13        |
| Tianjin                                                             | 5.18          | 36.63   | 10.11  | 8.79    | 15.62    | 2.17    | 5.18    | 20.88    | 3.41    | 7.12     | 12.43    | 6.54         | 1.58        |
| Handan                                                              | 1.8           | 4.06    | 56.23  | 9.32    | 16.09    | 1.15    | 22.33   | 6.12     | 0.65    | 12.98    | 1.5      | 32.02        | 1.84        |
| Xingtai                                                             | 9.77          | 8.26    | 14.13  | 57.19   | 9.25     | 3.11    | 6.72    | 15.03    | 3.41    | 30.98    | 5.61     | 10.73        | 6.23        |
| Cangzhou                                                            | 2.18          | 6.94    | 34.05  | 8.84    | 35.94    | 1.58    | 12.2    | 9.31     | 1.28    | 8.5      | 2.87     | 15.95        | 1.61        |
| Chengde                                                             | 7.56          | 8.2     | 2.63   | 3.89    | 3.5      | 20.79   | 1.51    | 6.02     | 23.12   | 1.99     | 23.16    | 1.83         | 1.67        |
| Baoding                                                             | 0.53          | 1.01    | 6.68   | 2.34    | 2.86     | 0.24    | 58.59   | 1.56     | 0.12    | 5.32     | 0.33     | 21.24        | 0.64        |
| Langfang                                                            | 6.15          | 20.3    | 19.72  | 21.33   | 25.08    | 2.57    | 8.93    | 44.87    | 3.09    | 14.58    | 7.16     | 12.08        | 2.35        |
| Beijing                                                             | 2.34          | 6.96    | 2.61   | 3.79    | 3.28     | 2.72    | 1.35    | 5.37     | 29.01   | 3.14     | 15.15    | 1.95         | 0.83        |
| Hengshui                                                            | 2.49          | 2.98    | 21.02  | 13.48   | 7.8      | 0.97    | 17.46   | 5.19     | 0.7     | 57.51    | 1.44     | 32.84        | 2.65        |
| Tangshan                                                            | 3.48          | 15.47   | 3.91   | 5.17    | 4.81     | 2.92    | 2.53    | 8.95     | 12.02   | 4.38     | 40.34    | 3.24         | 0.98        |
| Shijiazhuang                                                        | 0.91          | 1.52    | 15.71  | 4.43    | 5.35     | 0.5     | 49.74   | 2.35     | 0.29    | 11.7     | 0.63     | 59.02        | 1.14        |
| Zhangjiakou                                                         | 5.83          | 2.66    | 1.53   | 3.48    | 1.71     | 3.6     | 0.64    | 3.46     | 1.74    | 1.32     | 2.48     | 0.94         | 12.55       |
| Sum                                                                 | 72.89         | 129.61  | 197.27 | 160.46  | 140.57   | 50.85   | 191.53  | 152.19   | 84.06   | 168.08   | 122.48   | 204.33       | 38.2        |

Table S18. The maximum allowable emissions and the emissions variation ratio of two pollutants under different emission scenarios.

| (a) NO <sub>x</sub>      |       |       |                    |       |                    |
|--------------------------|-------|-------|--------------------|-------|--------------------|
| Region                   | S0    | S1    | S1 Variation Ratio | S2    | S2 Variation Ratio |
| ZJK                      | 7.47  | 4.26  | -0.43              | 9.79  | 0.31               |
| CD                       | 14.78 | 7.83  | -0.47              | 18.77 | 0.27               |
| QHD                      | 3.48  | 2.09  | -0.40              | 3.83  | 0.10               |
| BJ                       | 25.90 | 12.17 | -0.53              | 26.94 | 0.04               |
| CZ                       | 5.81  | 3.31  | -0.43              | 5.92  | 0.02               |
| TJ                       | 27.79 | 16.39 | -0.41              | 25.84 | -0.07              |
| HS                       | 8.06  | 3.38  | -0.58              | 5.32  | -0.34              |
| XT                       | 11.24 | 5.73  | -0.49              | 7.31  | -0.35              |
| TS                       | 30.87 | 23.15 | -0.25              | 19.75 | -0.36              |
| LF                       | 9.90  | 5.05  | -0.49              | 5.25  | -0.47              |
| BD                       | 17.37 | 8.51  | -0.51              | 9.03  | -0.48              |
| HD                       | 17.59 | 8.97  | -0.49              | 8.97  | -0.49              |
| SJZ                      | 23.64 | 13.48 | -0.43              | 9.69  | -0.59              |
| Average variation ratios | 15.68 | 8.79  | -0.44              | 11.95 | -0.23              |

  

| (b) PM <sub>2.5</sub>    |       |      |                    |      |                    |
|--------------------------|-------|------|--------------------|------|--------------------|
| Region                   | S0    | S1   | S1 Variation Ratio | S2   | S2 Variation Ratio |
| ZJK                      | 3.89  | 2.22 | -0.43              | 7.12 | 0.83               |
| QHD                      | 2.00  | 1.16 | -0.42              | 3.44 | 0.72               |
| CD                       | 7.48  | 4.34 | -0.42              | 8.61 | 0.15               |
| TJ                       | 10.62 | 4.46 | -0.58              | 6.48 | -0.39              |
| HD                       | 8.83  | 4.50 | -0.49              | 3.71 | -0.58              |
| XT                       | 6.77  | 3.93 | -0.42              | 2.78 | -0.59              |
| HS                       | 4.74  | 2.42 | -0.49              | 1.85 | -0.61              |
| TS                       | 7.57  | 4.16 | -0.45              | 2.95 | -0.61              |
| CZ                       | 3.18  | 1.78 | -0.44              | 1.21 | -0.62              |
| BJ                       | 8.25  | 5.20 | -0.37              | 2.64 | -0.68              |
| BD                       | 10.33 | 4.85 | -0.53              | 2.99 | -0.71              |
| LF                       | 4.95  | 2.13 | -0.57              | 1.39 | -0.72              |
| SJZ                      | 9.88  | 5.04 | -0.49              | 2.67 | -0.73              |
| Average variation ratios | 6.81  | 3.55 | -0.48              | 2.59 | -0.46              |

Table S19. The GDP and the variation ratio of GDP under different emission scenarios.

| Region                   | S0    | S1    | S1 Variation Ratio | S2    | S2 Variation Ratio |
|--------------------------|-------|-------|--------------------|-------|--------------------|
| BD                       | 1.40  | 0.68  | -0.51              | 0.69  | -0.51              |
| BJ                       | 31.46 | 15.14 | -0.52              | 31.12 | -0.01              |
| CD                       | 0.37  | 0.20  | -0.46              | 0.47  | 0.26               |
| CZ                       | 0.87  | 0.50  | -0.43              | 0.82  | -0.05              |
| HD                       | 1.67  | 0.85  | -0.49              | 0.84  | -0.50              |
| HS                       | 0.49  | 0.21  | -0.57              | 0.31  | -0.37              |
| LF                       | 1.11  | 0.56  | -0.50              | 0.56  | -0.50              |
| QHD                      | 1.14  | 0.68  | -0.40              | 1.34  | 0.17               |
| SJZ                      | 3.94  | 2.22  | -0.44              | 1.57  | -0.60              |
| TJ                       | 21.92 | 12.62 | -0.42              | 19.80 | -0.10              |
| TS                       | 4.07  | 3.01  | -0.26              | 2.55  | -0.37              |
| XT                       | 0.39  | 0.20  | -0.48              | 0.24  | -0.38              |
| ZJK                      | 0.82  | 0.46  | -0.43              | 1.11  | 0.37               |
| Average variation ratios | 5.36  | 2.87  | -0.46              | 4.72  | -0.12              |

Table S20. The variation ratio of GDP in three hypothetical cases.

| Region                      | Unchanged          |       | Emission Intensity |       | Emission Intensity |       |
|-----------------------------|--------------------|-------|--------------------|-------|--------------------|-------|
|                             | Emission Intensity |       | Reduced by 20%     |       | Reduced by 50%     |       |
|                             | S1                 | S2    | S1'                | S2'   | S1''               | S2''  |
| ZJK                         | -0.43              | 0.37  | -0.29              | 0.71  | 0.14               | 1.73  |
| CD                          | -0.46              | 0.26  | -0.33              | 0.57  | 0.07               | 1.51  |
| QHD                         | -0.40              | 0.17  | -0.25              | 0.47  | 0.20               | 1.35  |
| BJ                          | -0.52              | -0.01 | -0.40              | 0.24  | -0.04              | 0.98  |
| CZ                          | -0.43              | -0.05 | -0.29              | 0.18  | 0.14               | 0.89  |
| TJ                          | -0.42              | -0.10 | -0.28              | 0.13  | 0.15               | 0.81  |
| HS                          | -0.57              | -0.37 | -0.46              | -0.22 | -0.14              | 0.25  |
| TS                          | -0.26              | -0.37 | -0.08              | -0.22 | 0.48               | 0.25  |
| XT                          | -0.48              | -0.38 | -0.35              | -0.23 | 0.04               | 0.24  |
| LF                          | -0.50              | -0.50 | -0.37              | -0.37 | 0.00               | 0.01  |
| HD                          | -0.49              | -0.50 | -0.36              | -0.37 | 0.02               | 0.00  |
| BD                          | -0.51              | -0.51 | -0.39              | -0.39 | -0.02              | -0.02 |
| SJZ                         | -0.44              | -0.60 | -0.29              | -0.50 | 0.13               | -0.21 |
| Average<br>variation ratios | -0.46              | 0.12  | -0.32              | 0.00  | 0.09               | 0.60  |

Table S21. Emission reduction ratio in scenario S1 (relative to 2016).

Unit: %

|                   | BJ | TJ | SJZ | CD | ZJK | QHD | TS | LF | BD | CZ | HS | XT | HD |
|-------------------|----|----|-----|----|-----|-----|----|----|----|----|----|----|----|
| NO <sub>x</sub>   | 53 | 25 | 43  | 43 | 43  | 40  | 41 | 49 | 51 | 47 | 58 | 49 | 49 |
| PM <sub>2.5</sub> | 37 | 45 | 49  | 44 | 43  | 42  | 58 | 57 | 53 | 42 | 49 | 42 | 49 |

Note: The data come from information not yet made public by the government.

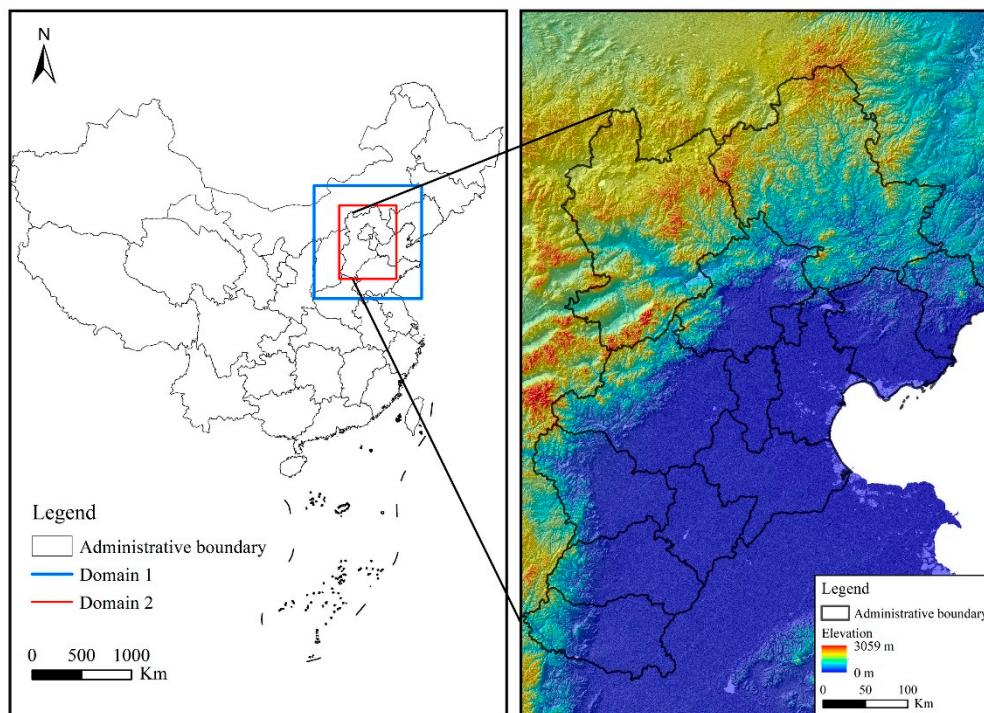

Figure S1. Domain coverage.
